# Supplementary material for: Single-cell transcriptomic atlas of lung microvascular regeneration after targeted endothelial cell ablation
Source: eLife journal article supplement (doi:10.7554/elife.80900), 2023-04-20
Supplement: supp [file elife-80900-supp-v1.zip]

Archive with 10 entries (10 files):
- elife_poa_e80900_Figure_1_figure_supplement_1.pdf
- elife_poa_e80900_Figure_3_figure_supplement_1.pdf
- elife_poa_e80900_Figure_3_figure_supplement_2.pdf
- elife_poa_e80900_Figure_4_figure_supplement_1.pdf
- elife_poa_e80900_Figure_6_figure_supplement_1.pdf
- elife_poa_e80900_Figure_6_figure_supplement_2.pdf
- elife_poa_e80900_Figure_6_figure_supplement_3.pdf
- elife_poa_e80900_Figure_7_figure_supplement_1.pdf
- elife_poa_e80900_Figure_8_figure_supplement_1.pdf
- elife_poa_e80900_Figure_8_figure_supplement_2.pdf
