# Supplementary figures and images for: Single-cell transcriptomic atlas of lung microvascular regeneration after targeted endothelial cell ablation
Source: eLife journal article supplement (doi:10.7554/elife.80900), 2023-04-20

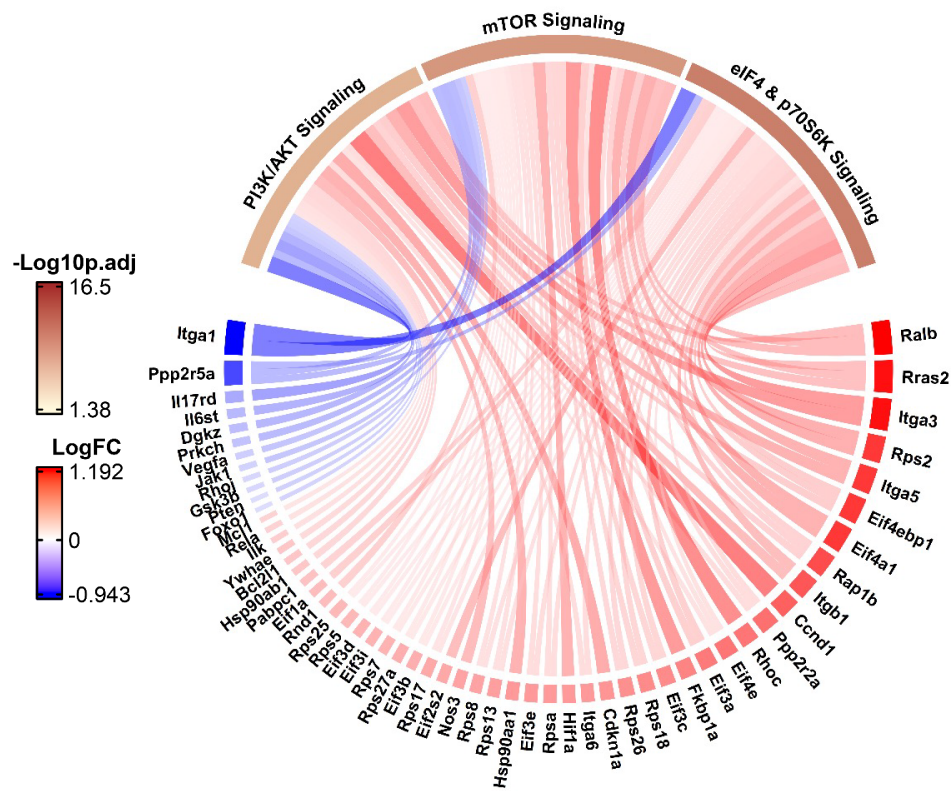

Figure 8 - figure supplement 2

Supplement: supp [file elife-80900-supp-v1.zip]

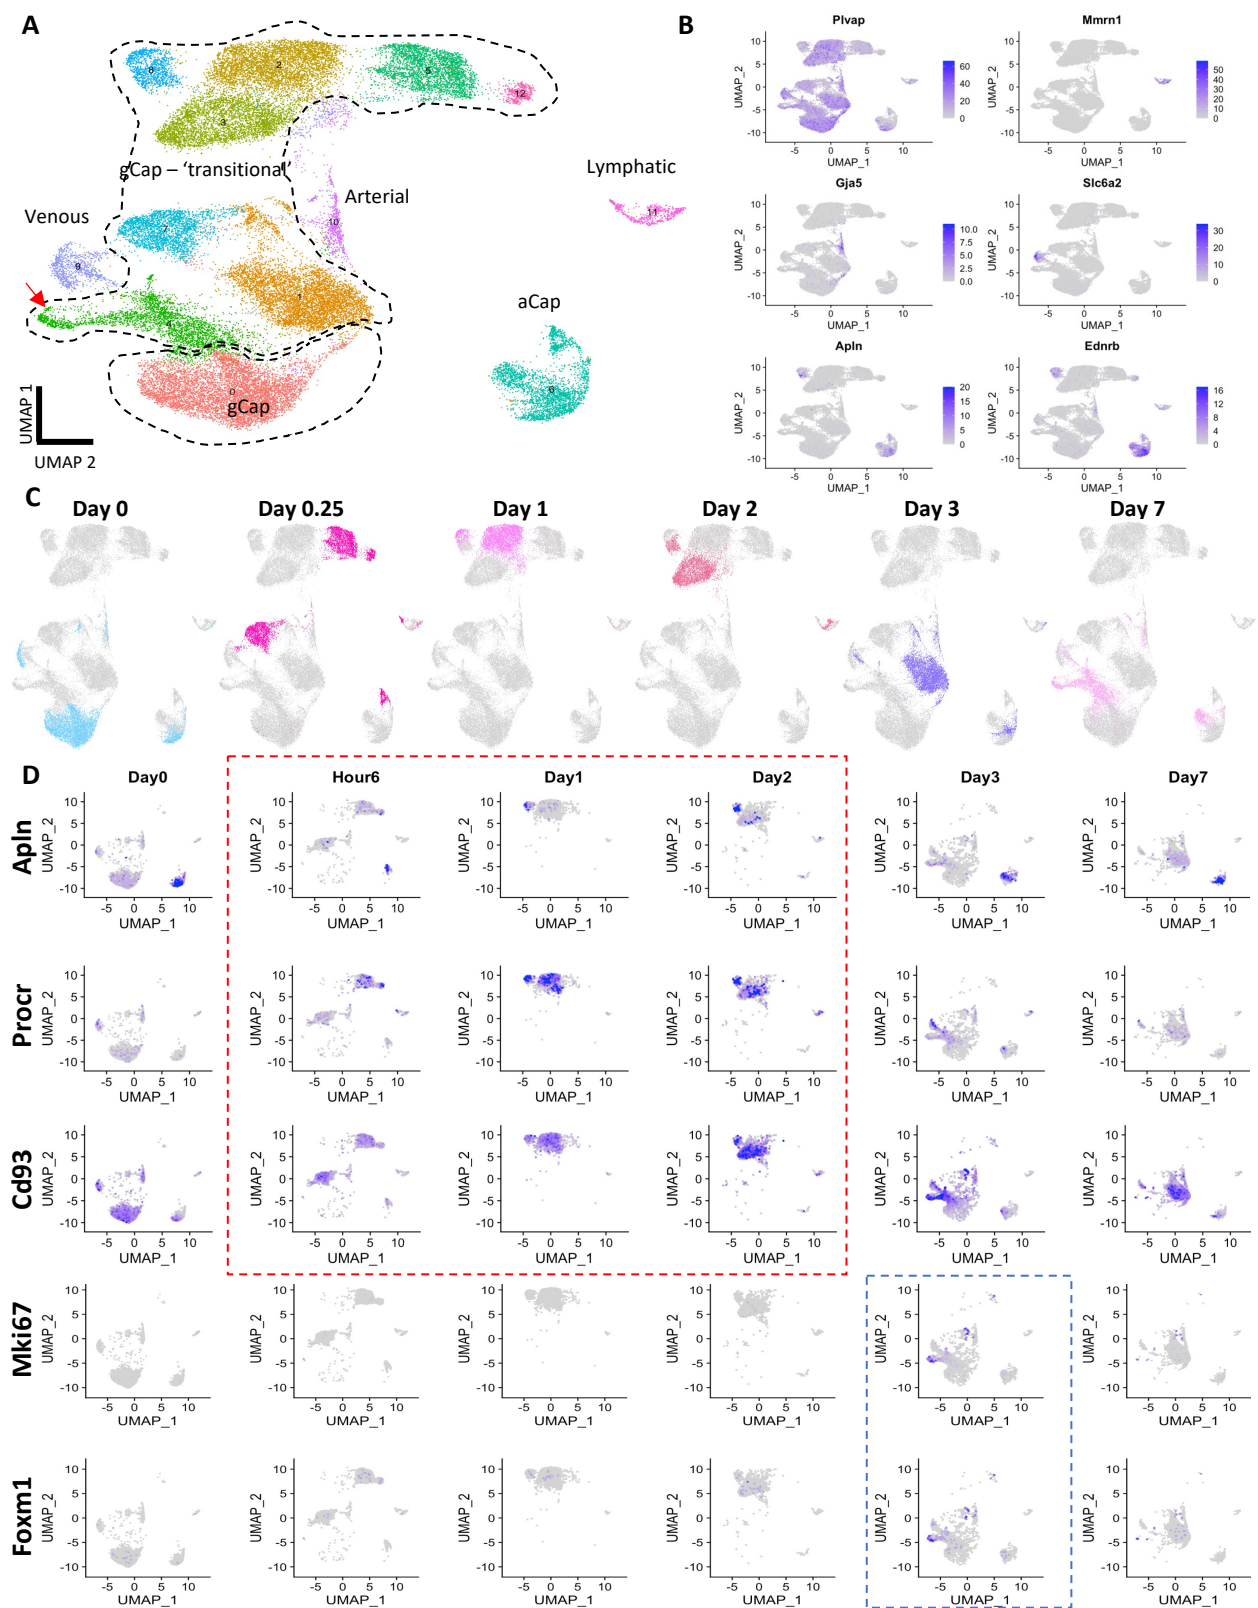

Figure 6 – Figure Supplement 3

Supplement: supp [file elife-80900-supp-v1.zip]

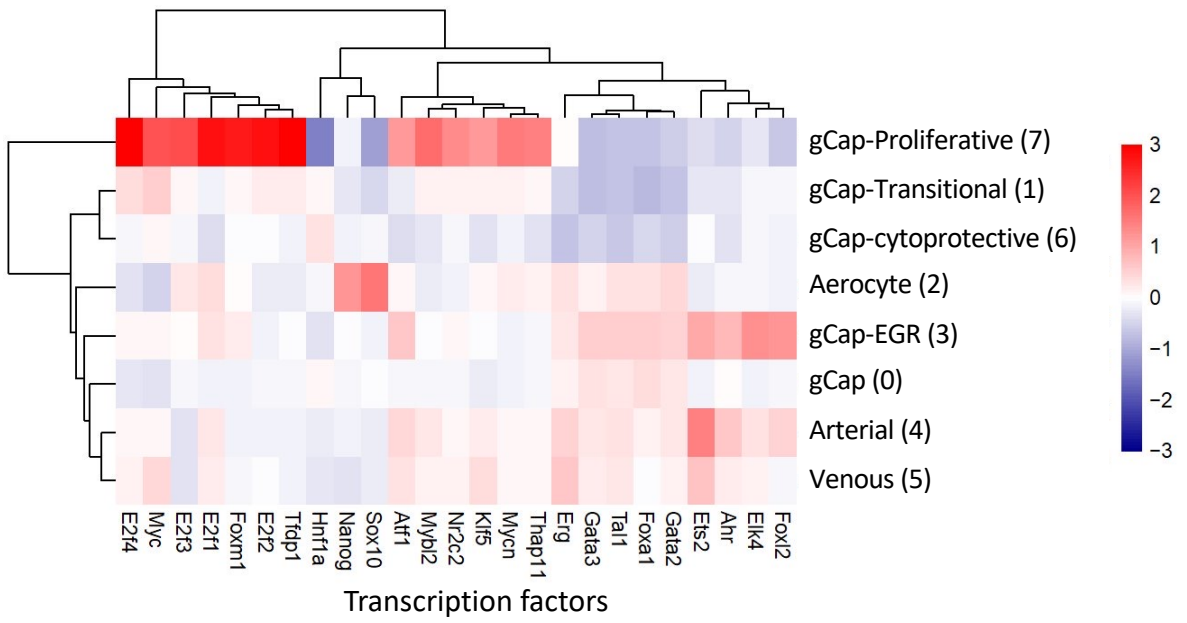

Figure 6 – Figure Supplement 2

Supplement: supp [file elife-80900-supp-v1.zip]

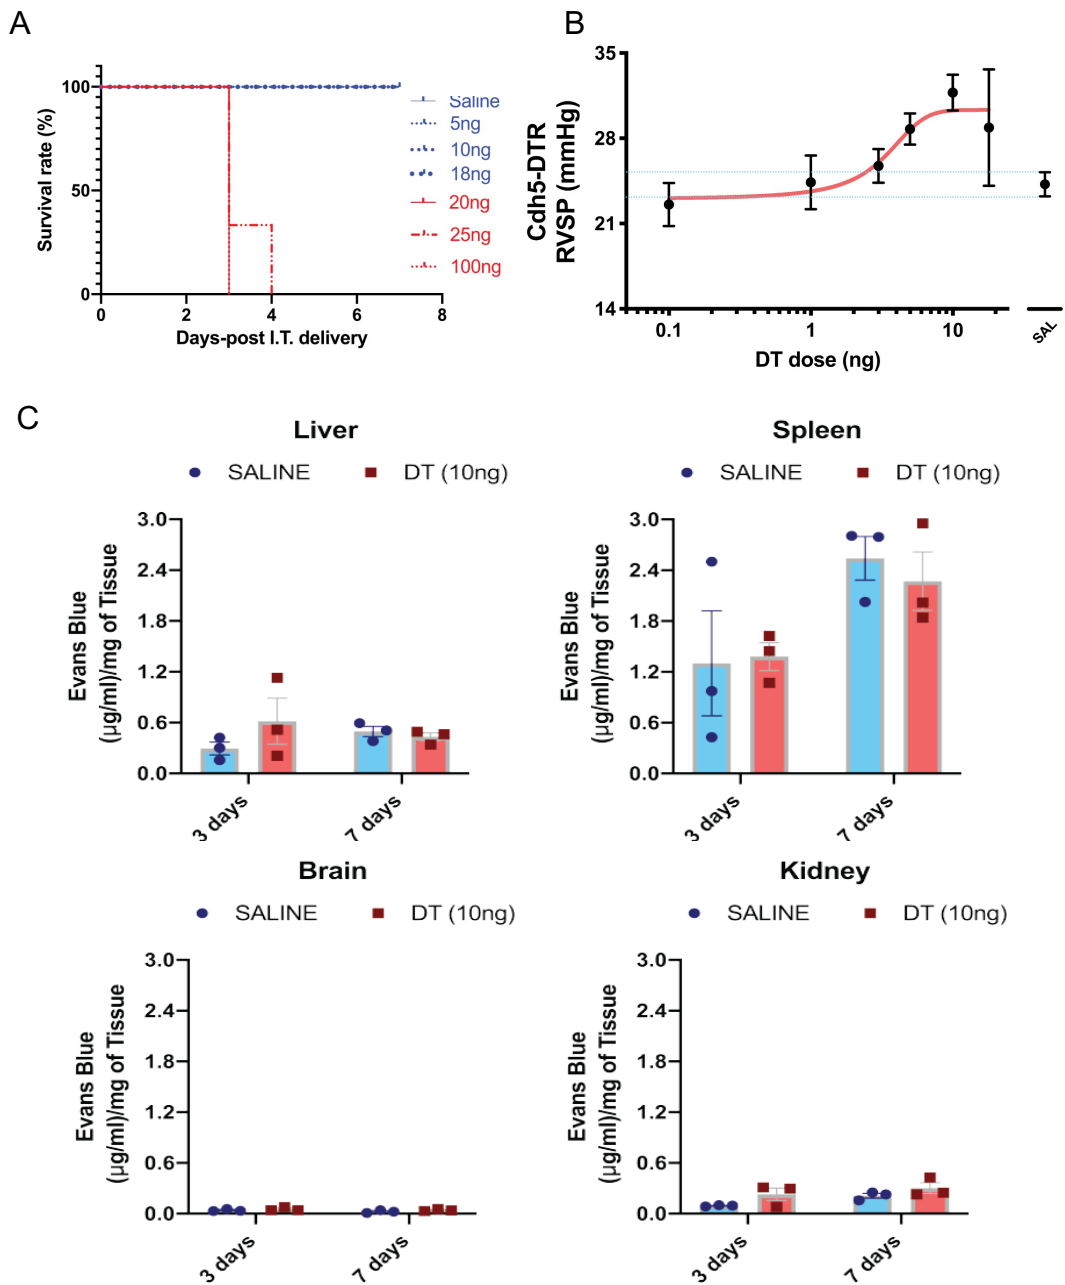

Figure 1 – Supplement Figure 1

Supplement: supp [file elife-80900-supp-v1.zip › elife_poa_e80900_Figure_1_figure_supplement_1.pdf]

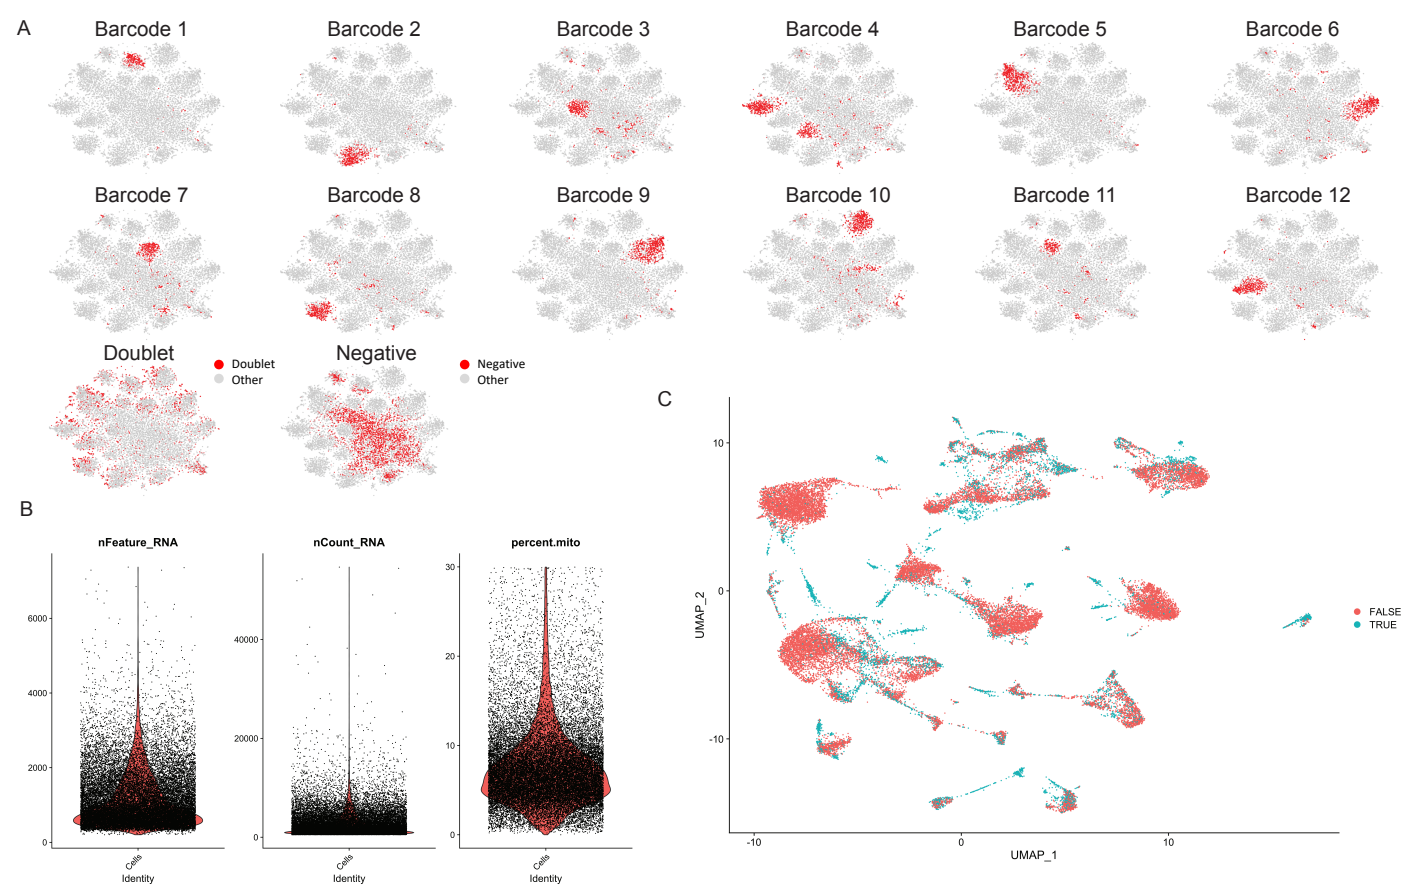

Figure 3 – Figure Supplement 1

Supplement: supp [file elife-80900-supp-v1.zip › elife_poa_e80900_Figure_3_figure_supplement_1.pdf]

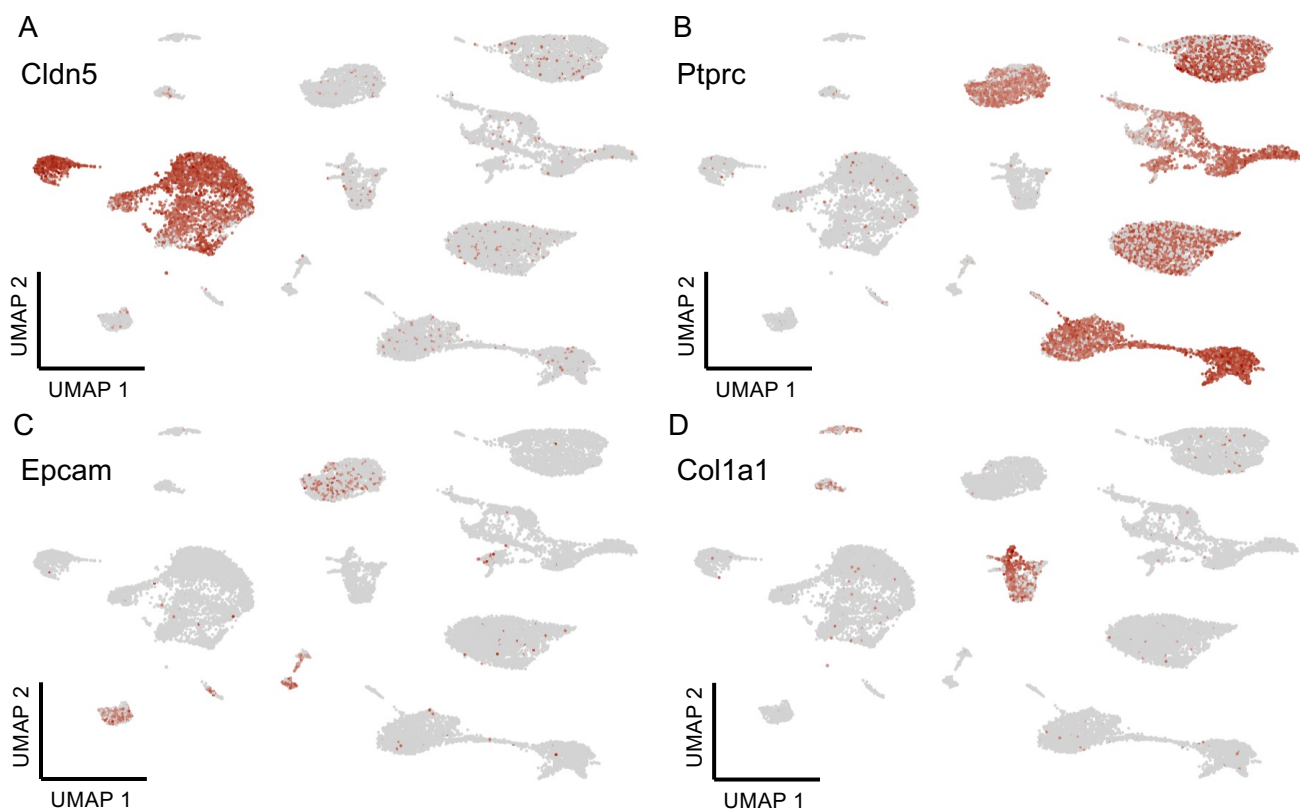

Figure 3 – Figure Supplement 2

Supplement: supp [file elife-80900-supp-v1.zip › elife_poa_e80900_Figure_3_figure_supplement_2.pdf]

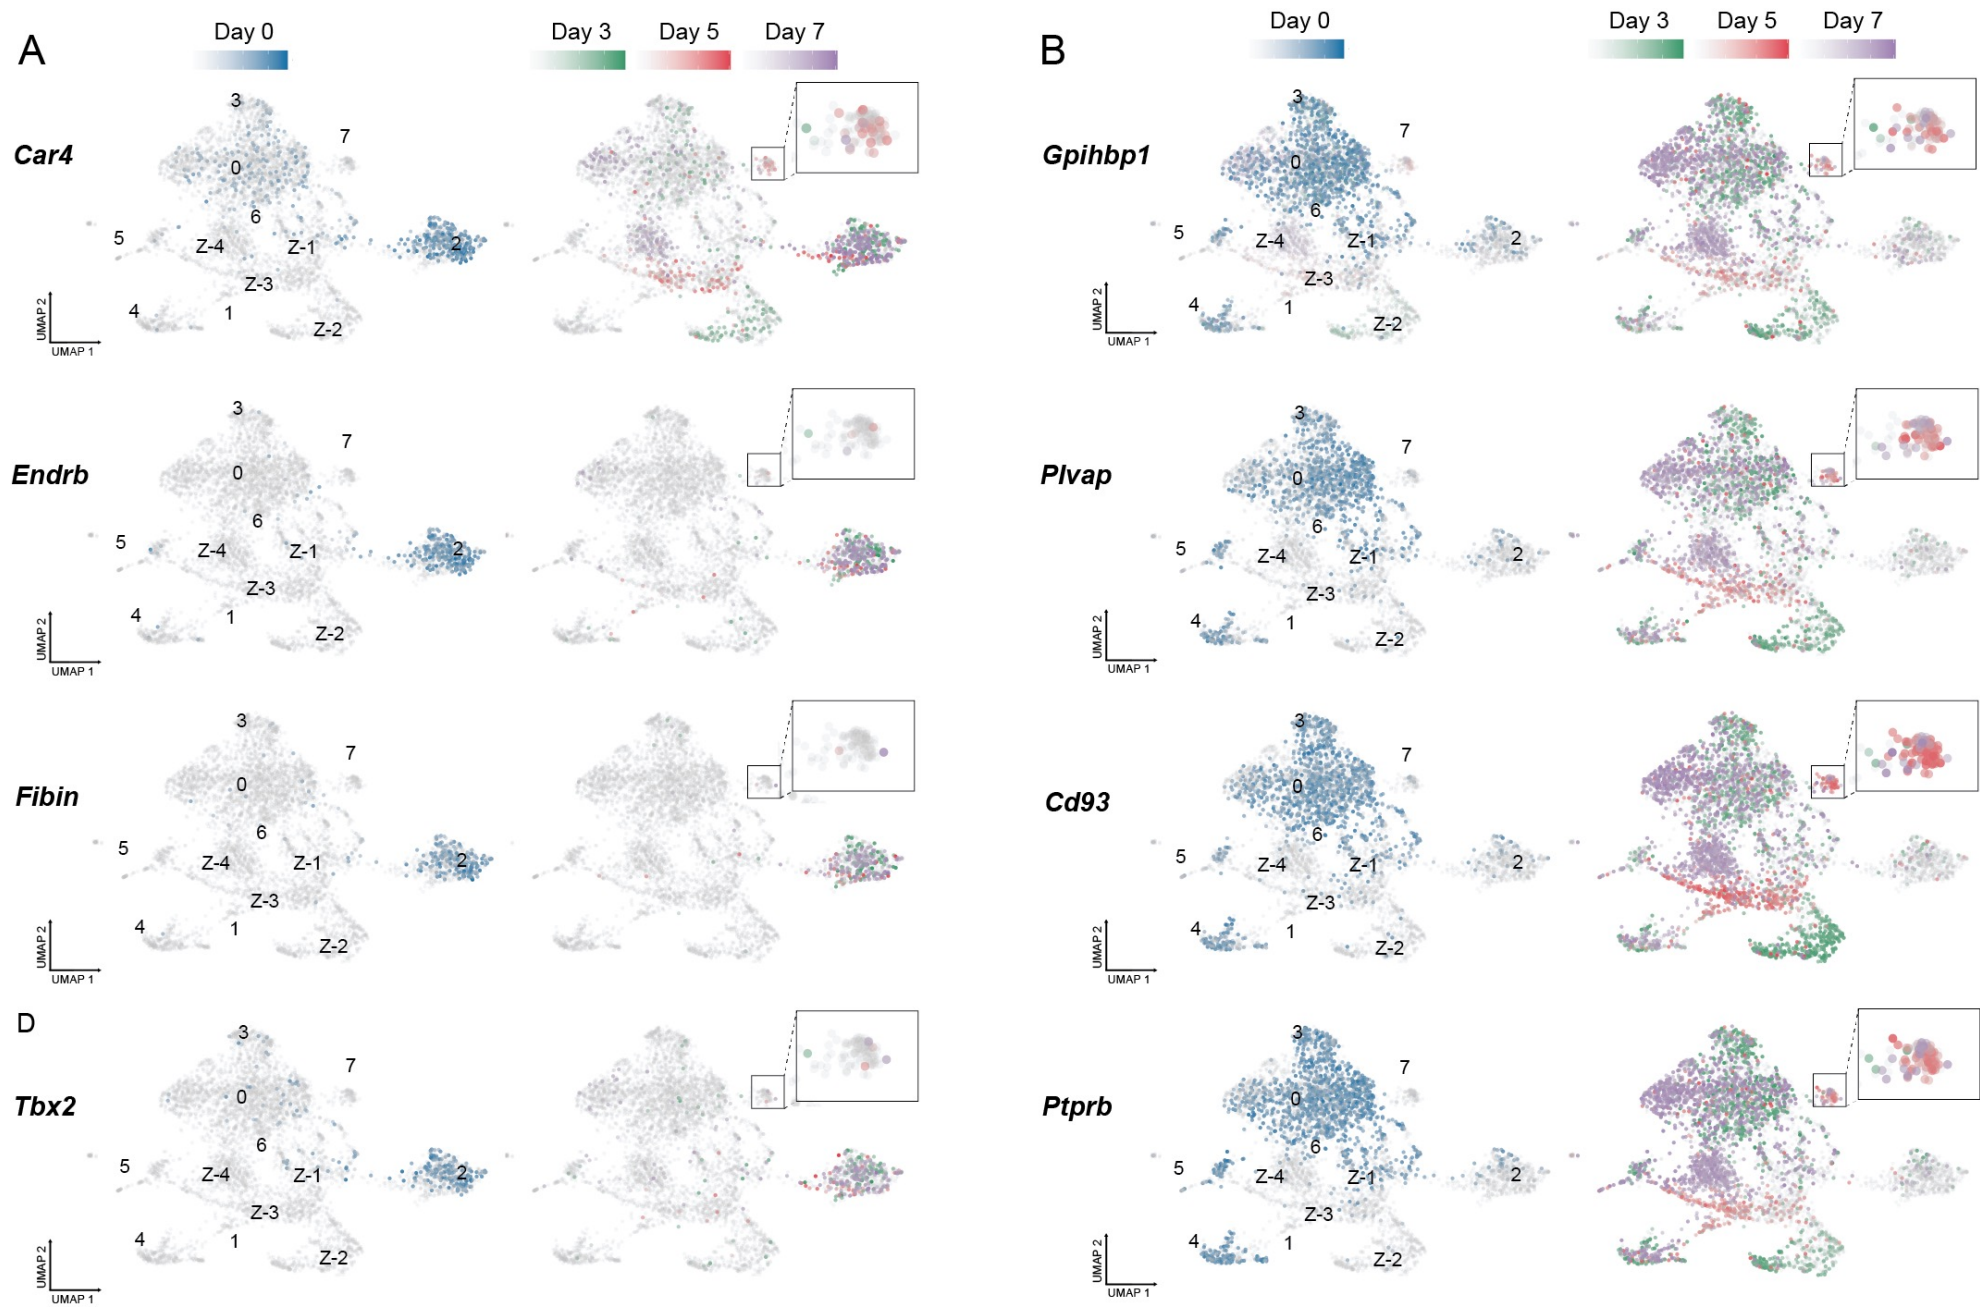

Figure 4 - Figure Supplement 1

Supplement: supp [file elife-80900-supp-v1.zip › elife_poa_e80900_Figure_4_figure_supplement_1.pdf]

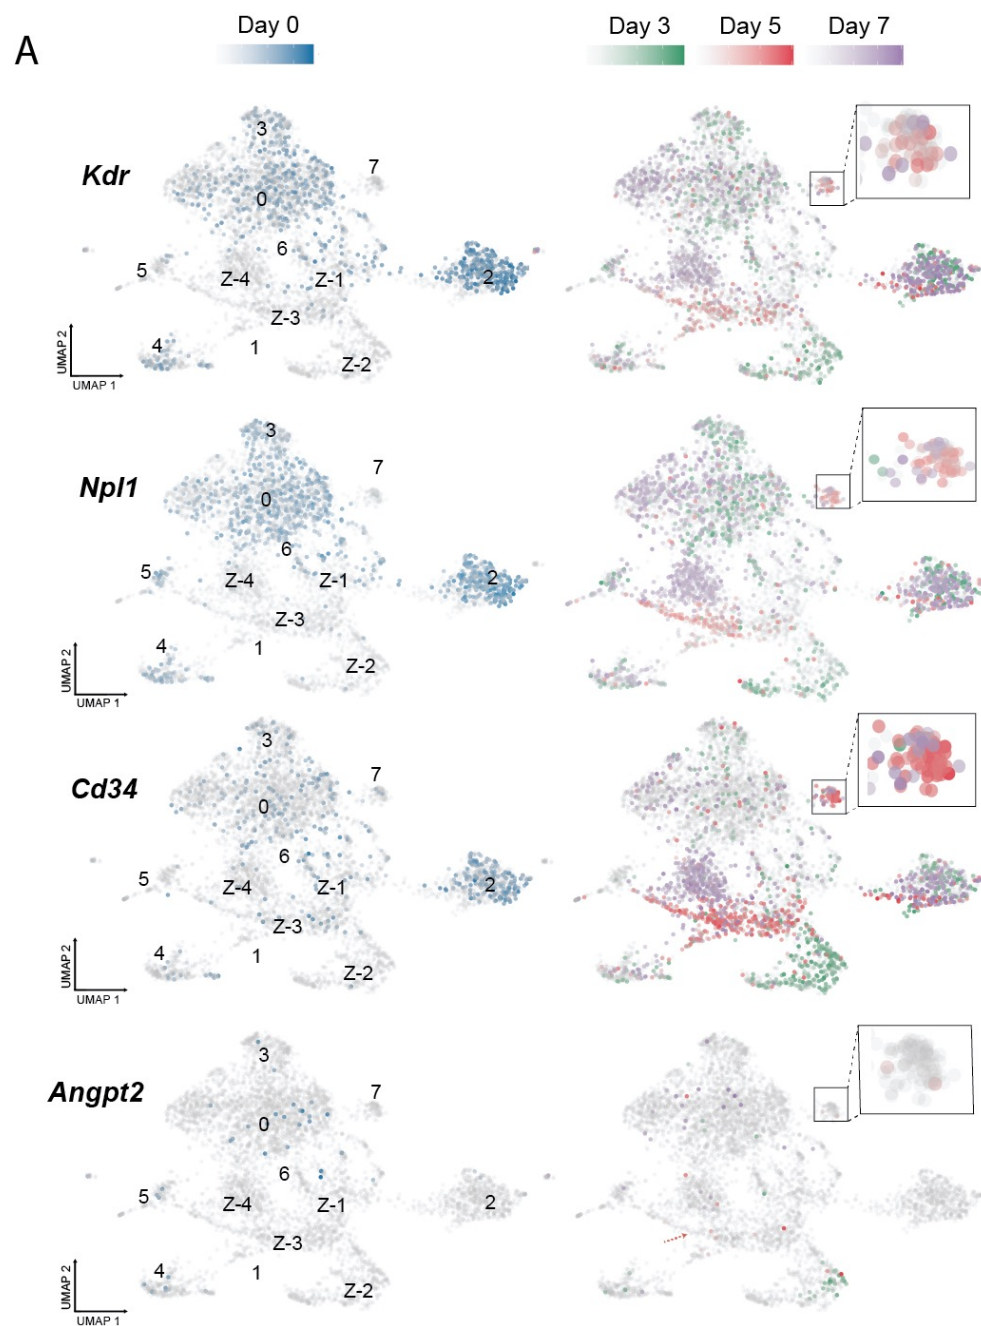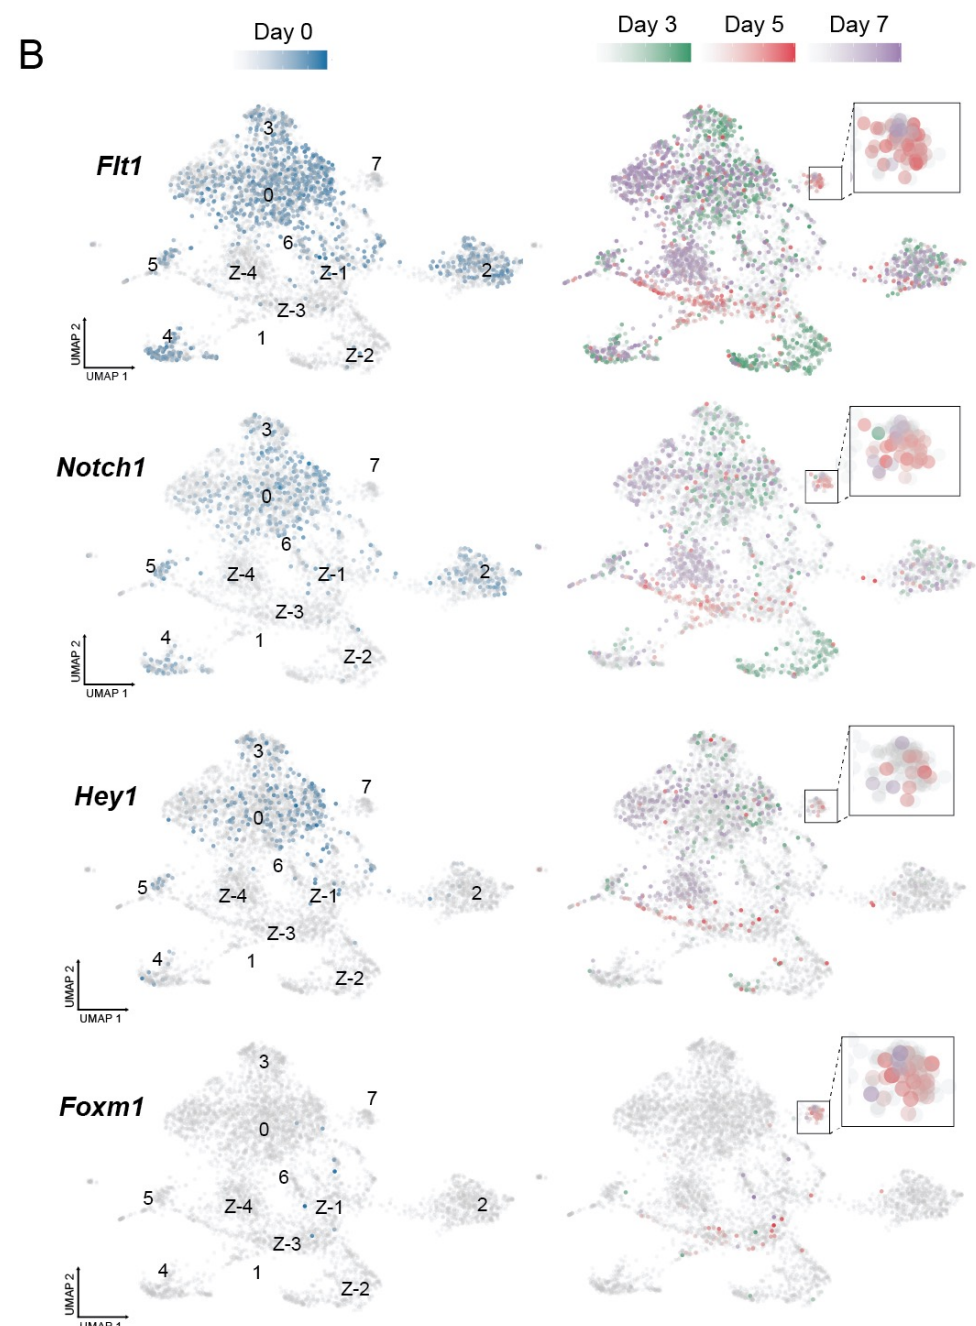

Figure 6 - Figure Supplement 1

Supplement: supp [file elife-80900-supp-v1.zip › elife_poa_e80900_Figure_6_figure_supplement_1.pdf]

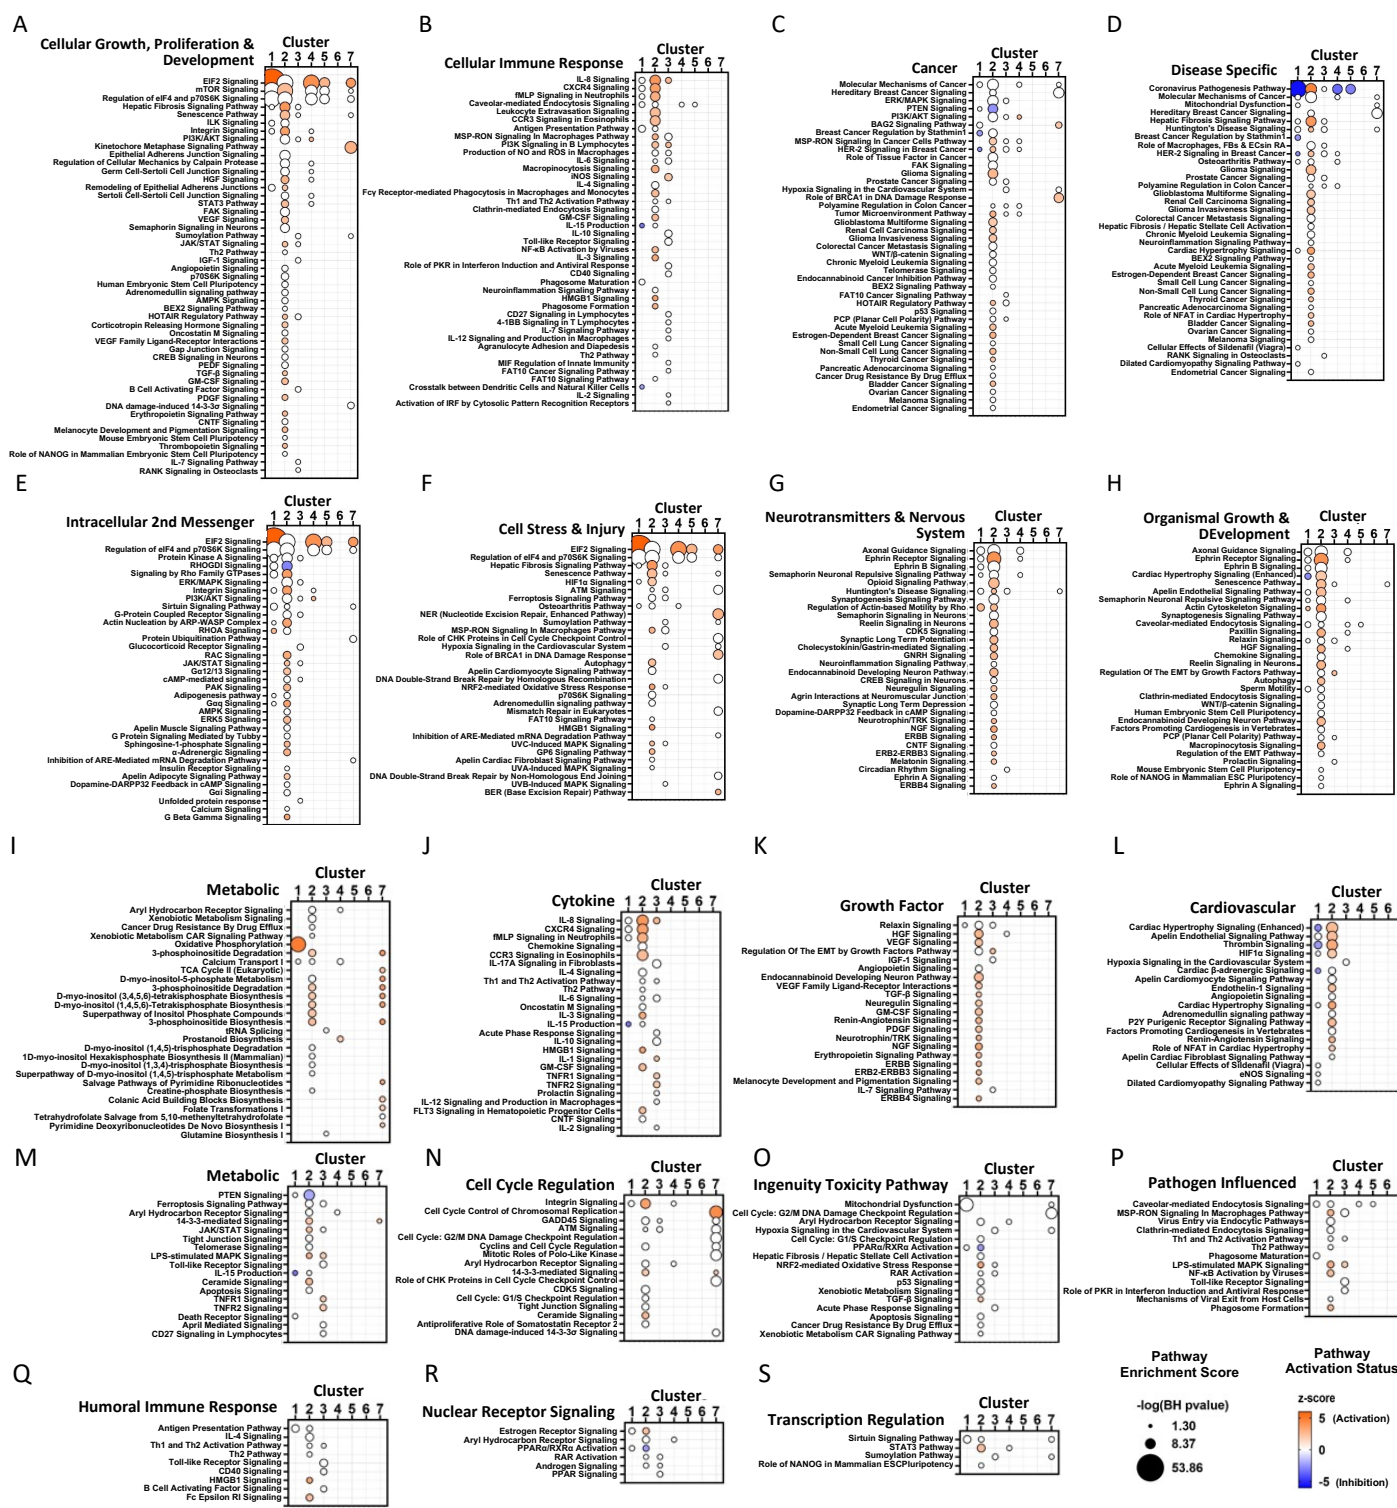

Supplement: supp [file elife-80900-supp-v1.zip › elife_poa_e80900_Figure_7_figure_supplement_1.pdf]

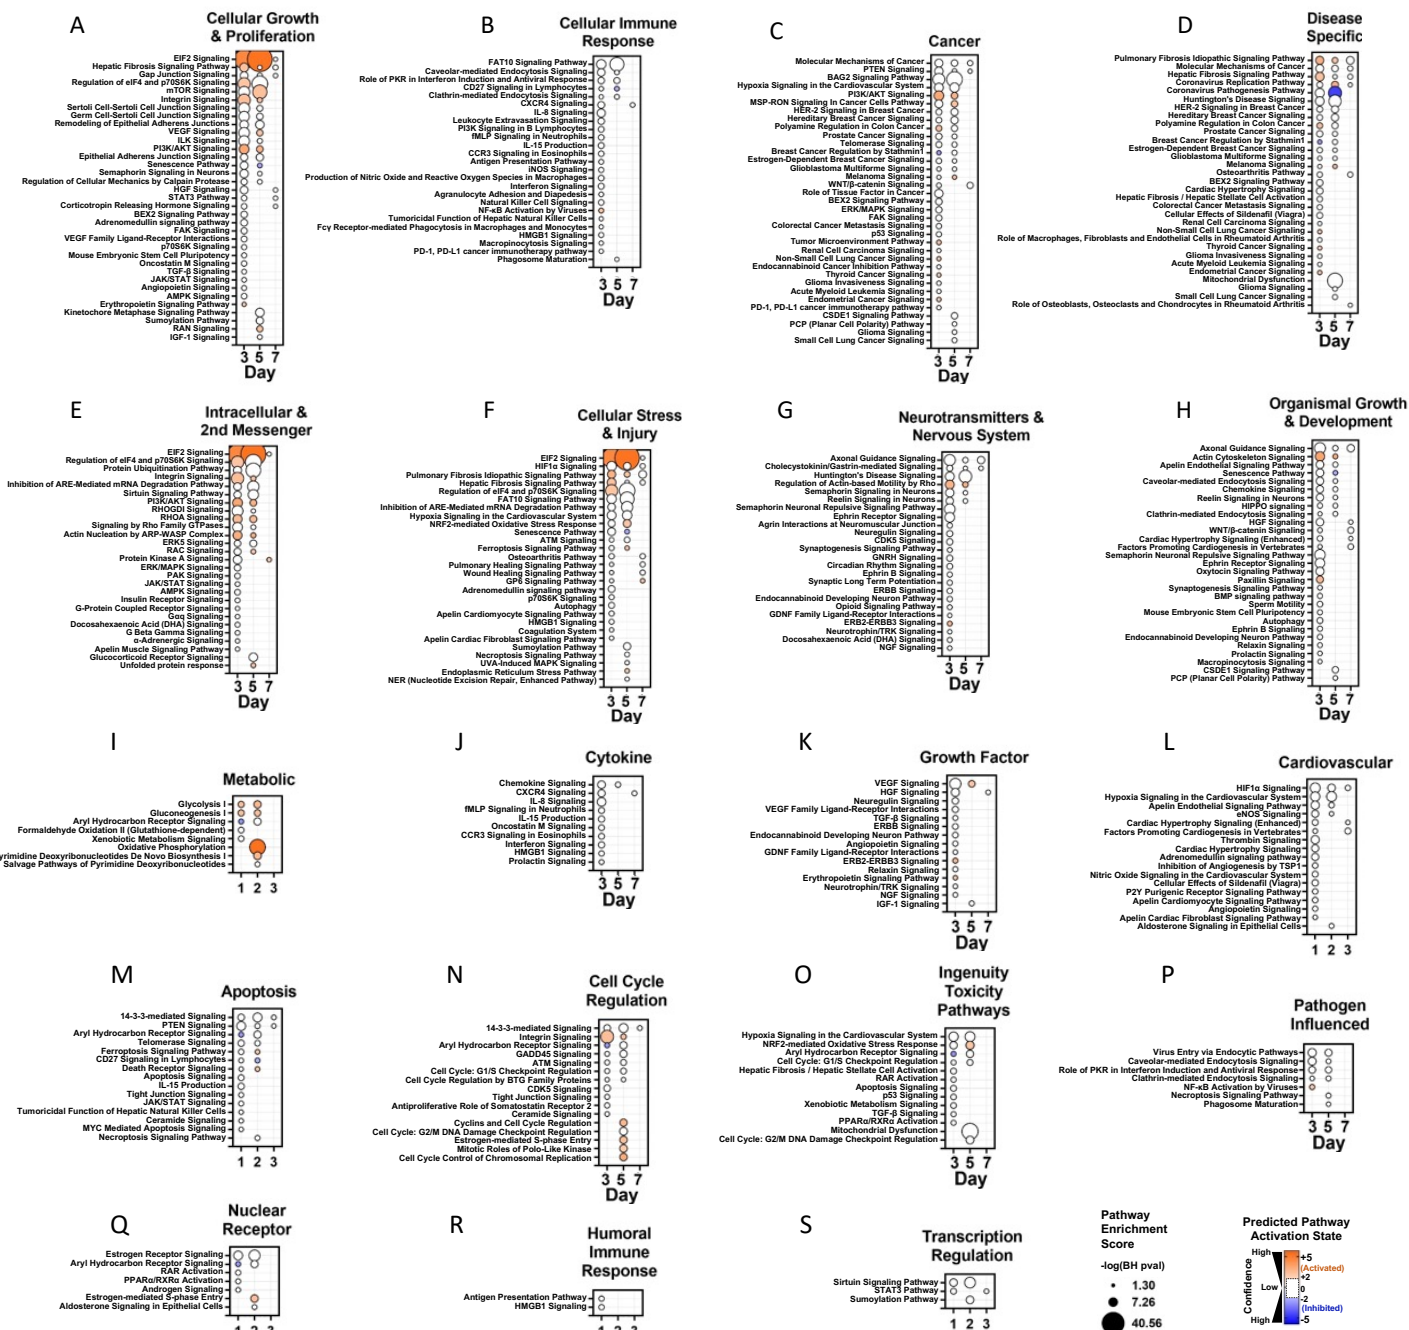

Figure 8 – Figure Supplement 1

Supplement: supp [file elife-80900-supp-v1.zip › elife_poa_e80900_Figure_8_figure_supplement_1.pdf]
